# Supplementary material for: Wettability of vertically-oriented graphenes with different intersheet distances
Source: Royal Society of Chemistry journal article supplement (doi:10.1039/c6ra27428e), 2017-01-01
Supplement: c6ra27428e1.pdf [file c6ra27428e1.pdf]

## **Supplementary Information**

### **Wettability of vertically-oriented graphenes with different intersheet distances**

Xiaorui Shuai, Zheng Bo<sup>✉</sup>, Jing Kong, Jianhua Yan and Kefa Cen

State Key Laboratory of Clean Energy Utilization, Institute for Thermal Power Engineering, College of Energy Engineering, Zhejiang University, Hangzhou, Zhejiang Province 310027, China

Correspondence should be addressed to Zheng Bo (Email: bozh@zju.edu.cn; Tel: 86 571 87951369)

**Table S1.** The positions, the ratios of  $I_D/I_G$  and  $I_{2D}/I_G$ , and FWHMs of D, G, 2D, and D+G peaks of VGs

| Sample  | D                   | $\omega_D$          | G                   | $\omega_G$          | 2D                  | $\omega_{2D}$       | D+G                 | $I_D/I_G$ | $I_{2D}/I_G$ |
|---------|---------------------|---------------------|---------------------|---------------------|---------------------|---------------------|---------------------|-----------|--------------|
|         | (cm <sup>-1</sup> ) |           |              |
| DC-VGs  | 1340                | 57                  | 1590                | 54                  | 2680                | 64                  | 2933                | 2.81      | 0.46         |
| ICP-VGs | 1343                | 52                  | 1592                | 56                  | 2686                | 61                  | 2937                | 2.74      | 0.67         |
| MW-VGs  | 1346                | 55                  | 1593                | 55                  | 2690                | 63                  | 2937                | 2.72      | 0.88         |

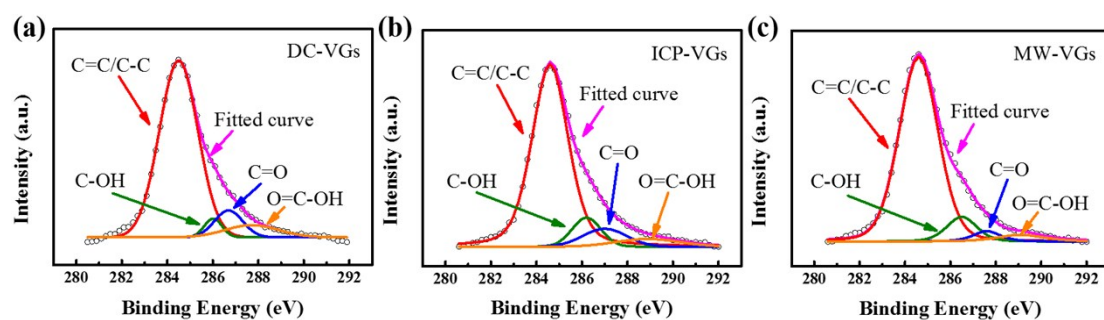

**Fig. S1** Curve fit of C 1s spectra of DC-VGs, ICP-VGs, and MW-VGs, respectively.

The Gaussian line fitted C 1s spectra of VGs were obtained. In the spectra, four peaks centering at  $\sim 284.5$  eV (the  $sp^2$  and  $sp^3$  hybridized carbon, C=C/C-C),  $\sim 286.5$  eV (the hydroxyl carbon, C-OH),  $287.6$  eV (the carbonyl carbon, C=O), and  $\sim 289.1$  eV (the carboxylate carbon, O=C-OH) are decomposed, corresponding to different oxygen functional groups.

**Table S2** Fractions of four components corresponding to C atom in C=C/C–C, C–OH, C=O, and O=C–OH for VG samples

|         |                | C=C/C–C   | C–OH      | C=O       | O=C–OH    |
|---------|----------------|-----------|-----------|-----------|-----------|
| DC-VGs  | Binding Energy | 284.49 eV | 286.01 eV | 286.69 eV | 287.71 eV |
|         | Fraction       | 79.65%    | 3.88%     | 8.85%     | 7.62%     |
| ICP-VGs | Binding Energy | 284.60 eV | 286.20 eV | 287.05 eV | 288.92 eV |
|         | Fraction       | 76.16%    | 9.50%     | 8.86%     | 5.48%     |
| MW-VGs  | Binding Energy | 284.60 eV | 286.40 eV | 287.62 eV | 289.1 eV  |
|         | Fraction       | 83.83%    | 9.06%     | 3.68%     | 3.43%     |

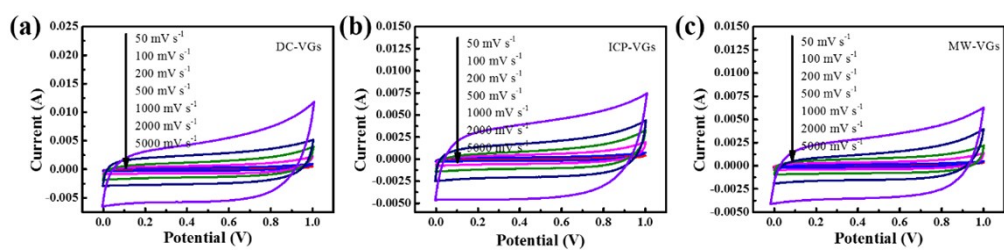

**Fig. S2** CV curves of supercapacitors using (a) DC-VGs, (b) ICP-VGs, and (c) MW-VGs electrodes in 6.0 M KOH aqueous solution at different scan rates from 50 to 5000  $\text{mV s}^{-1}$ .
